# Supplementary material for: Transcriptional Regulation of the Outer Membrane Protein A in Acinetobacter baumannii
Source: PubMed Central journal article supplement (PMC7284552; doi:10.3390/microorganisms8050706), 2020-05-11
Supplement: microorganisms-08-00706-s001.pdf [file microorganisms-08-00706-s001.pdf]

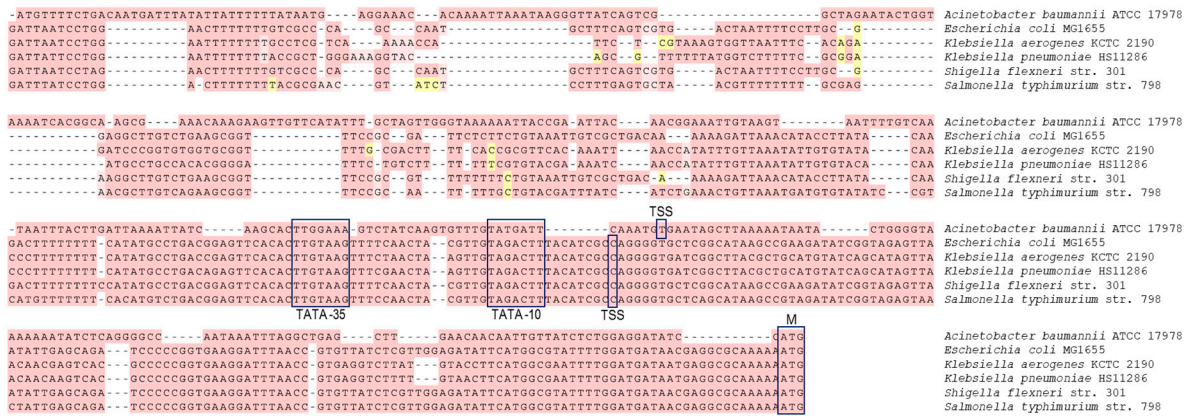

**Figure S1.** Promoter region of *OmpA* in *A. baumannii* ATCC 17978 and comparison with other Gram-negative bacteria. Based on this result, the *OmpA* promoters from six gram-negative bacteria were compared through the Multi-Align Program. The six strains of bacteria were *A. baumannii* ATCC 17978(Ab), *E. coli* MG1655(Ec), *Klebsiella aerogenes* KCTC 2190(Kaer), *Klebsiella pneumoniae* HS11286(Kpn), *Shigella flexneri* str. 301(Sfl), and *Salmonella typhimurium* str. 798(Styph). The location of the TATA boxes and TSS seemed to be conserved among the six bacteria. However, the *AbOmpA* promoter, including its TATA box and TSS, exhibited an atypical sequence, while the remaining five bacterial promoter regions showed a strong similarity.

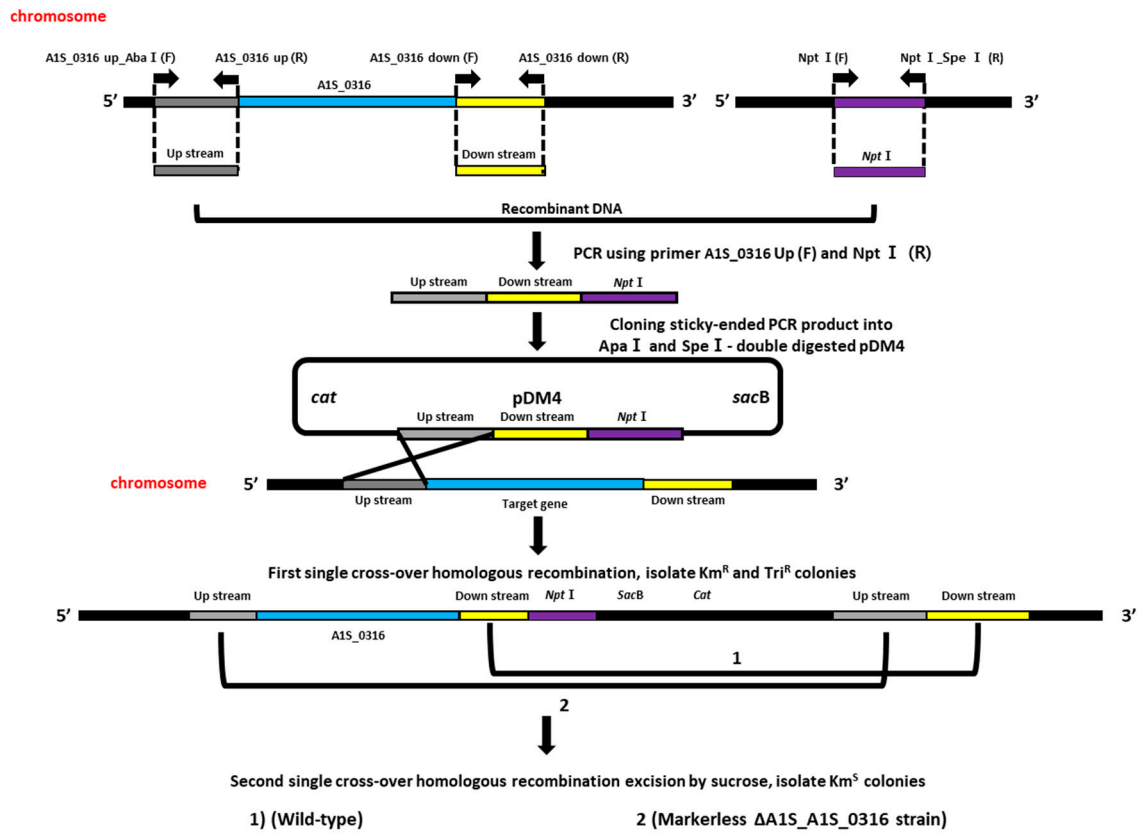

**Figure S2.** Schematic representation of the construction of the  $\Delta A1S_0316$  mutant and its complementary strain of *A. baumannii* ATCC 17978.

**A**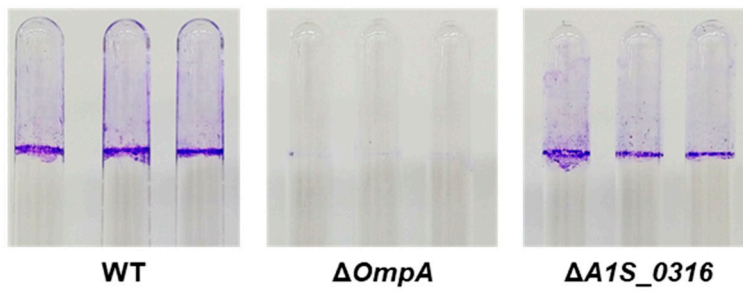**B**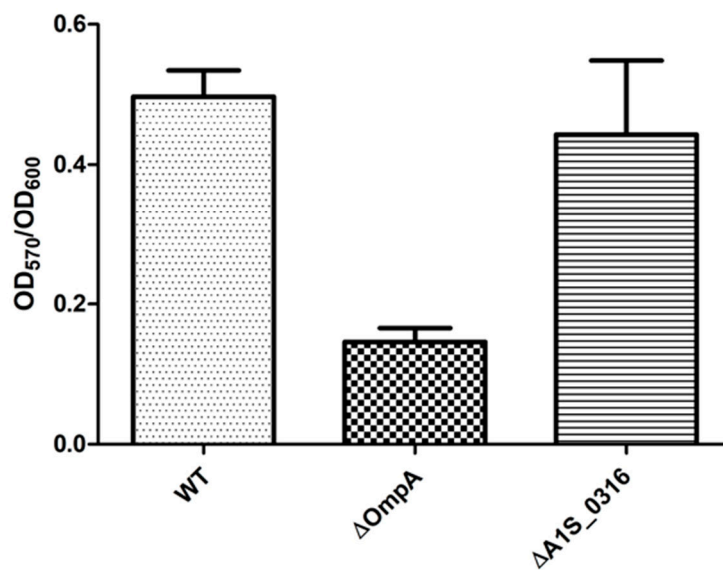

**Figure S3.** Qualitative assay showing biofilm formation on abiotic (glass) surface. Biofilms formed by *A. baumannii* ATCC 17978,  $\Delta OmpA$  and  $\Delta A1S\_0316$  strains. Biofilms were allowed to form for 24 h at 37 °C in LB media without salt. (A) Determination of biofilm synthesis was performed using crystal violet staining. (B) Biofilm values (OD<sub>570</sub>) were normalized by growth levels (OD<sub>600</sub>) to compensate for differences in growth rate. Error bars represent standard deviations.

**Table S1.** Bacteria Strains, plasmids used in this study

| Strain or plasmid        | Relevant characteristic(s)                                                                                                | Reference or source          |
|--------------------------|---------------------------------------------------------------------------------------------------------------------------|------------------------------|
| <b>Bacterial strains</b> |                                                                                                                           |                              |
| <i>A. baumannii</i>      |                                                                                                                           |                              |
| ATCC 17978               | Prototype strain                                                                                                          | [1]                          |
| ΔA1S_0316                | ATCC 17978 with ΔA1S_0316                                                                                                 | This study                   |
| ΔOmpA                    | ATCC 17978 with ΔOmpA                                                                                                     | Laboratory collection        |
| <i>E. coli</i>           |                                                                                                                           |                              |
| SY327 λ <i>pir</i>       | <i>supE44 ΔlacU169 (φ80 lacZΔM15) hsdR17<br/>recA1 endA1 gyrA96 thi-1 relA1 λpir</i> (phage lysogen); plasmid replication | Laboratory collection        |
| SM10 λ <i>pir</i>        | <i>thi thr leu tonA lacY supE recA::RP4-2-Tc::Mu Km λpir</i> π-requiring plasmids; conjugal donor                         | [2]                          |
| DH5α                     | <i>fhuA2 lac(del)U169 phoA glnV44 Φ80'<br/>lacZ(del)M15 gyrA96 recA1 relA1 endA1<br/>thi-1 hsdR17</i>                     | Laboratory collection<br>[3] |
| BL21 star (DE3)          | <i>F- ompT hsdS<sub>B</sub> (r<sub>B</sub><sup>-</sup>m<sub>B</sub><sup>-</sup>) gal dcm rne131</i><br>(DE3)              | Laboratory collection        |
| <b>Plasmids</b>          |                                                                                                                           |                              |
| pOH4                     | pHKD01 with <i>ompA</i> coding region with <i>nptI</i> ; Km <sup>R</sup>                                                  | [4]                          |
| pB4                      | derived from pET21a, HisTag-MBP, TEV cleavable                                                                            | Laboratory collection        |
| pB4::A1S_0316            | pB4 with A1S_0316                                                                                                         | This study                   |

|                   |                                                                                |                       |
|-------------------|--------------------------------------------------------------------------------|-----------------------|
| pDM4              | Suicide vector; <i>oriR6K</i> <i>sacBR</i> , Cm <sup>R</sup>                   |                       |
| pDM4::ΔA1S_0316   | pDM4 with ΔA1S_0316:: <i>nptI</i> ; , Cm <sup>R</sup> , Km <sup>R</sup>        | This study            |
| pAra::AbH-NS      | derived from pBAD, AbH-NS <i>oriAb</i> cloned<br>from pWH1266, Tc <sup>R</sup> | Laboratory collection |
| pWH1266           | pWH1277 cloned into pBR322, Amp <sup>R</sup> , Tc <sup>R</sup>                 | [5]                   |
| pWH1266::A1S_0316 | pWH1266 with AbCRISPR-array                                                    | This study            |
| pSA508            | Promoterless, Amp <sup>R</sup>                                                 | [6]                   |
| pSA508::AbOmpAp   | pSA508 with AbOmpAp                                                            | This study            |

---

**Table S2.** Identified proteins that bind to *AbOmpAp*

| <b>Order</b> | <b>Size<br/>(kDa)</b> | <b>Proteins</b>                                           | <b>Locus tag</b> |
|--------------|-----------------------|-----------------------------------------------------------|------------------|
| ①            | 154.9                 | DNA-directed RNA polymerase subunit beta                  | A1S_0288         |
| ②            | 61.1                  | 30S ribosomal protein S1                                  | A1S_1572         |
| ③            | 37.2                  | RNA polymerase alpha subunit                              | A1S_3056         |
|              | 30.7                  | protein chain elongation factor EF-Tu                     | A1S_0279         |
| ④            | 29.3                  | Putative transcriptional regulator                        | A1S_0316         |
|              | 24.9                  | minC activating cell division inhibitor a membrane ATPase | A1S_0880         |
|              | 19.0                  | putative two-component response regulator (citB)          | A1S_3304         |
|              | 14.2                  | putative universal stress protein A (UspA)                | A1S_2692         |
| ⑤            | 12.5                  | putative DNA binding protein                              | A1S_0268         |
| ⑥            | 9.3                   | DNA-binding protein HU-beta                               | A1S_1637         |

**Table S3.** Oligonucleotides used in this study.

| <b>Primers</b>     | <b>Primer sequence (5'→3')</b>                                           |
|--------------------|--------------------------------------------------------------------------|
| A1S_0316 SpeI UF   | GTT GGG CCC TGC TGA GCA AAT TGG AAA AC                                   |
| A1S_0316 UR        | AAT AAG ACA TCA TGT AAA ATA ATA TTT TTG ATA ATT<br>TAA AGT TTT CTT ACA C |
| A1S_0316 DF        | TTA TCA AAA ATA TTA TTT TAC ATG ATG TCT TAT TCG<br>TAT CCT T             |
| A1S_0316 DR        | CGA GGC AGA CTT ATA CAC AAT CAT TGC GGT TG                               |
| A1S_0316 NF        | TGA TTG TGT ATA AGT CTG CCT CGT GAA GAA GGT G                            |
| A1S_0316 ApaI NR   | GTT GGG CCC GAT CCG TCG ACC TGC AGG                                      |
| A1S_0316 PstI F    | TTC CAA TGC ATT GGC TGC AGG AGC TTA TTC CTC TGA<br>GGG AG                |
| A1S_0316 EcoRI R   | GGA ATT CGA AAG AAG AGA CAT CGA GAA AGC                                  |
| A1S_0316 LIC F     | GGG CGG CGG TGG TGG CGG CAT GGC AAT TTC AAG TTT<br>TGG C                 |
| A1S_0316 LIC R     | GTT CTT CTC CTT TGC GCC CTA GAT CTC GCC CTT TTC TGA<br>A                 |
| AbOmpAp EcoRI F    | CCG GAA TTC AAC ACA AAA TTA AAT AAG GGT TAT CAG                          |
| AbOmpAp PstI R     | GGT CTG CAG GAT AAC AAT TGT TGT TCA AGC TCA                              |
| AbOmpAp biotin F   | CGA GTG TTA TAG TGA GCT CA                                               |
| AbOmpAp biotin R   | CAG CTA ATG GAG CAG CAA CA                                               |
| AbOmpAp EMSA F     | GGC AAG CGA AAC AAA GAA GTT G                                            |
| AbOmpAp EMSA R     | AAT GGA GCA GCA ACA AGC ATA G                                            |
| 16s rRNA-sense     | GCA CAA GCG GTG GAG CAT                                                  |
| 16s rRNA-antisense | CGA AGG CAC CAA TCC ATC TC                                               |
| OmpA-sense         | TTG CAC TTG CTA CTA TGC TTG TTG                                          |
| OmpA-antisense     | TGG CTG TCT TGG AAA GTG TAA CC                                           |

1. Baumann, P.; Doudoroff, M.; Stanier, R.Y. A Study of the *Moraxella* Group II. Oxidative-negative Species (Genus *Acinetobacter*). *Journal of Bacteriology* **1968**, *95*, 1520-1541.
2. Simon, R.; Priefer, U.; Pühler, A. A Broad Host Range Mobilization System for In Vivo Genetic Engineering: Transposon Mutagenesis in Gram Negative Bacteria. *Bio/Technology* **1983**, *1*, 784-791, doi:10.1038/nbt1183-784.
3. Taylor, R.G.; Walker, D.C.; McLnnes, R.R. E.colihost strains significantly affect the quality of small scale plasmid DNA preparations used for sequencing. *Nucleic Acids Research* **1993**, *21*, 1677-1678, doi:10.1093/nar/21.7.1677.
4. Kwon, H.I.; Kim, S.; Oh, M.H.; Na, S.H.; Kim, Y.J.; Jeon, Y.H.; Lee, J.C. Outer membrane protein A contributes to antimicrobial resistance of *Acinetobacter baumannii* through the OmpA-like domain. *Journal of Antimicrobial Chemotherapy* **2017**, *72*, 3012-3015, doi:10.1093/jac/dkx257.
5. Hunger, M.; Schmucker, R.; Kishan, V.; Hillen, W. Analysis and nucleotide sequence of an origin of DNA replication in *Acinetobacter calcoaceticus* and its use for *Escherichia coli* shuttle plasmids. *Gene* **1990**, *87*, 45-51, doi:10.1016/0378-1119(90)90494-c.
6. Choy, H.E.; Adhya, S. Control of gal transcription through DNA looping: inhibition of the initial transcribing complex. **1992**, *89*, 11264-11268, doi:10.1073/pnas.89.23.11264.
